# Supplementary material for: S-Adenosyl-l-Methionine Overcomes uL3-Mediated Drug Resistance in p53 Deleted Colon Cancer Cells
Source: PubMed Central journal article supplement (PMC7795960; doi:10.3390/ijms22010103), 2020-12-24
Supplement: ijms-22-00103-s001.pdf [file ijms-22-00103-s001.pdf]

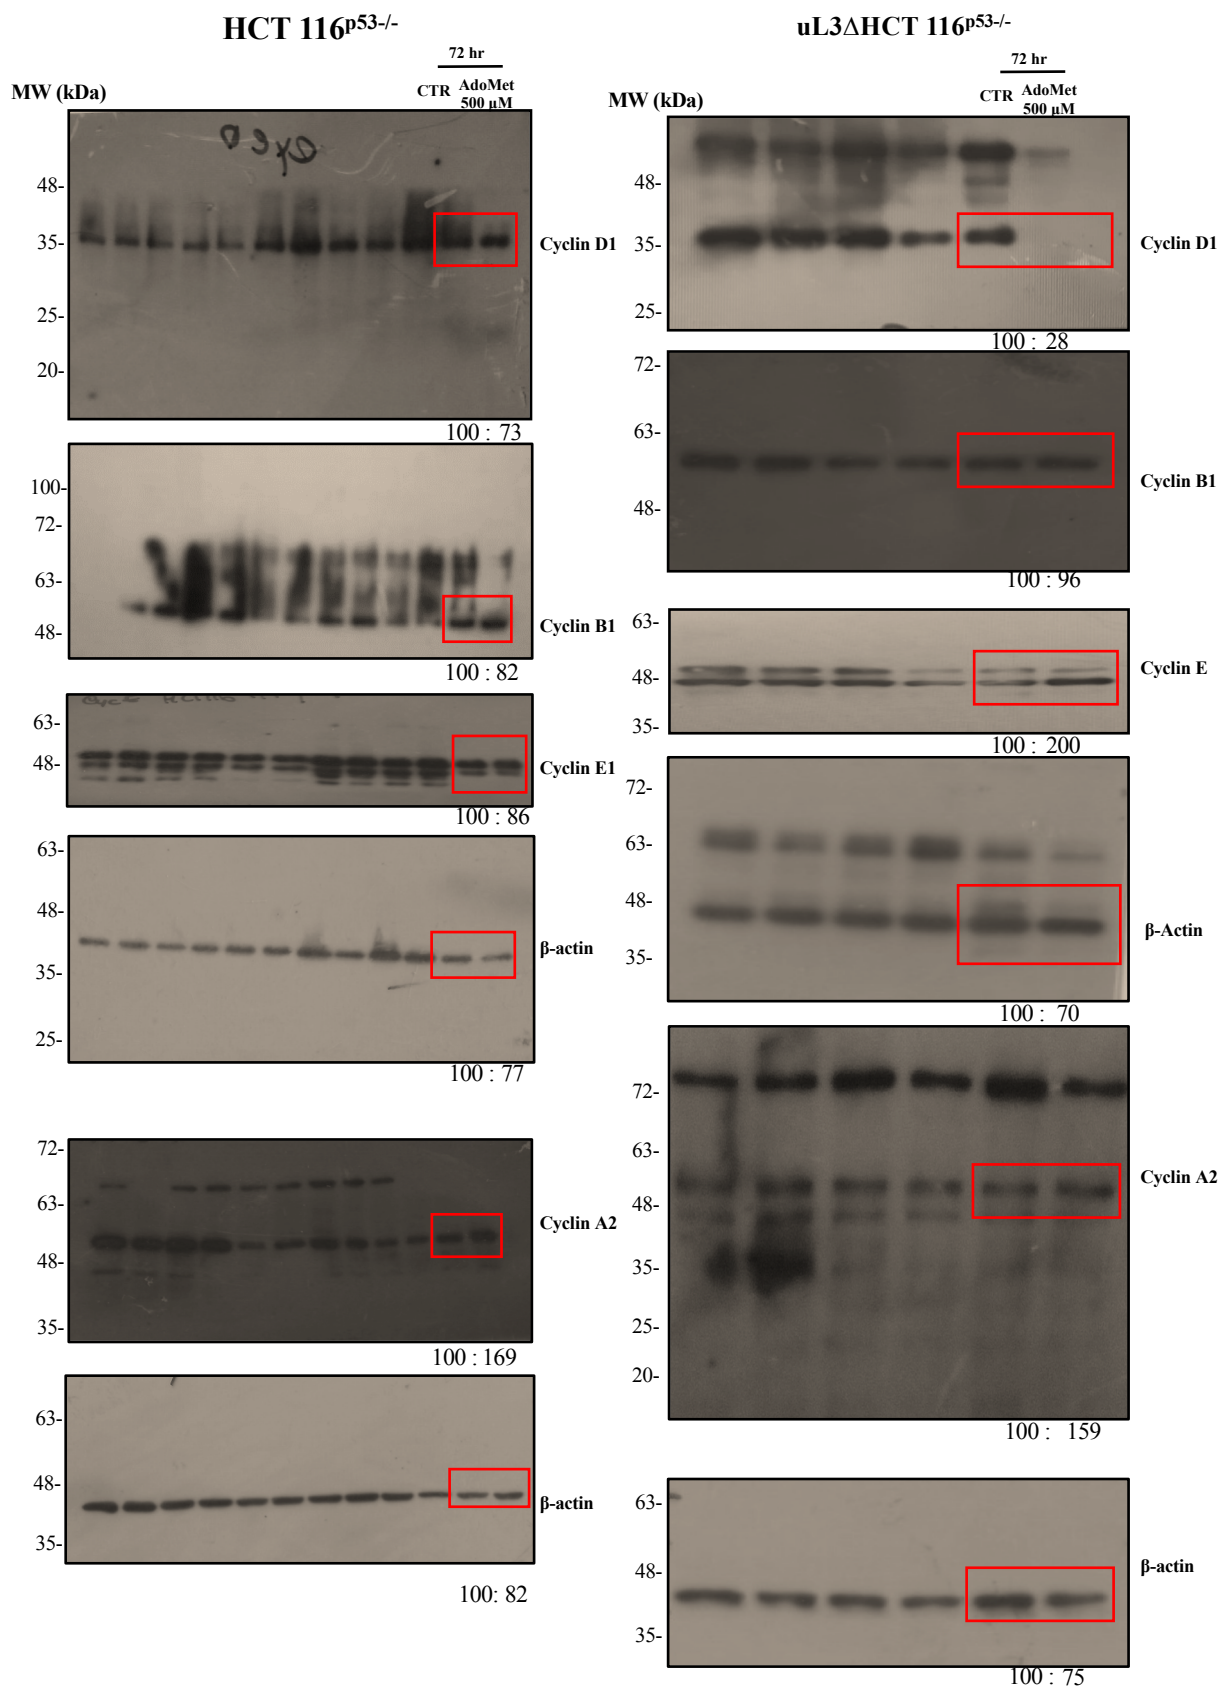

**Figure S1.** Effect of AdoMet on cell cycle regulatory proteins in HCT 116<sup>p53-/-</sup> and uL3ΔHCT 116<sup>p53-/-</sup> colon cancer cells. The cropped blots are used in the main figure (Figure 3).

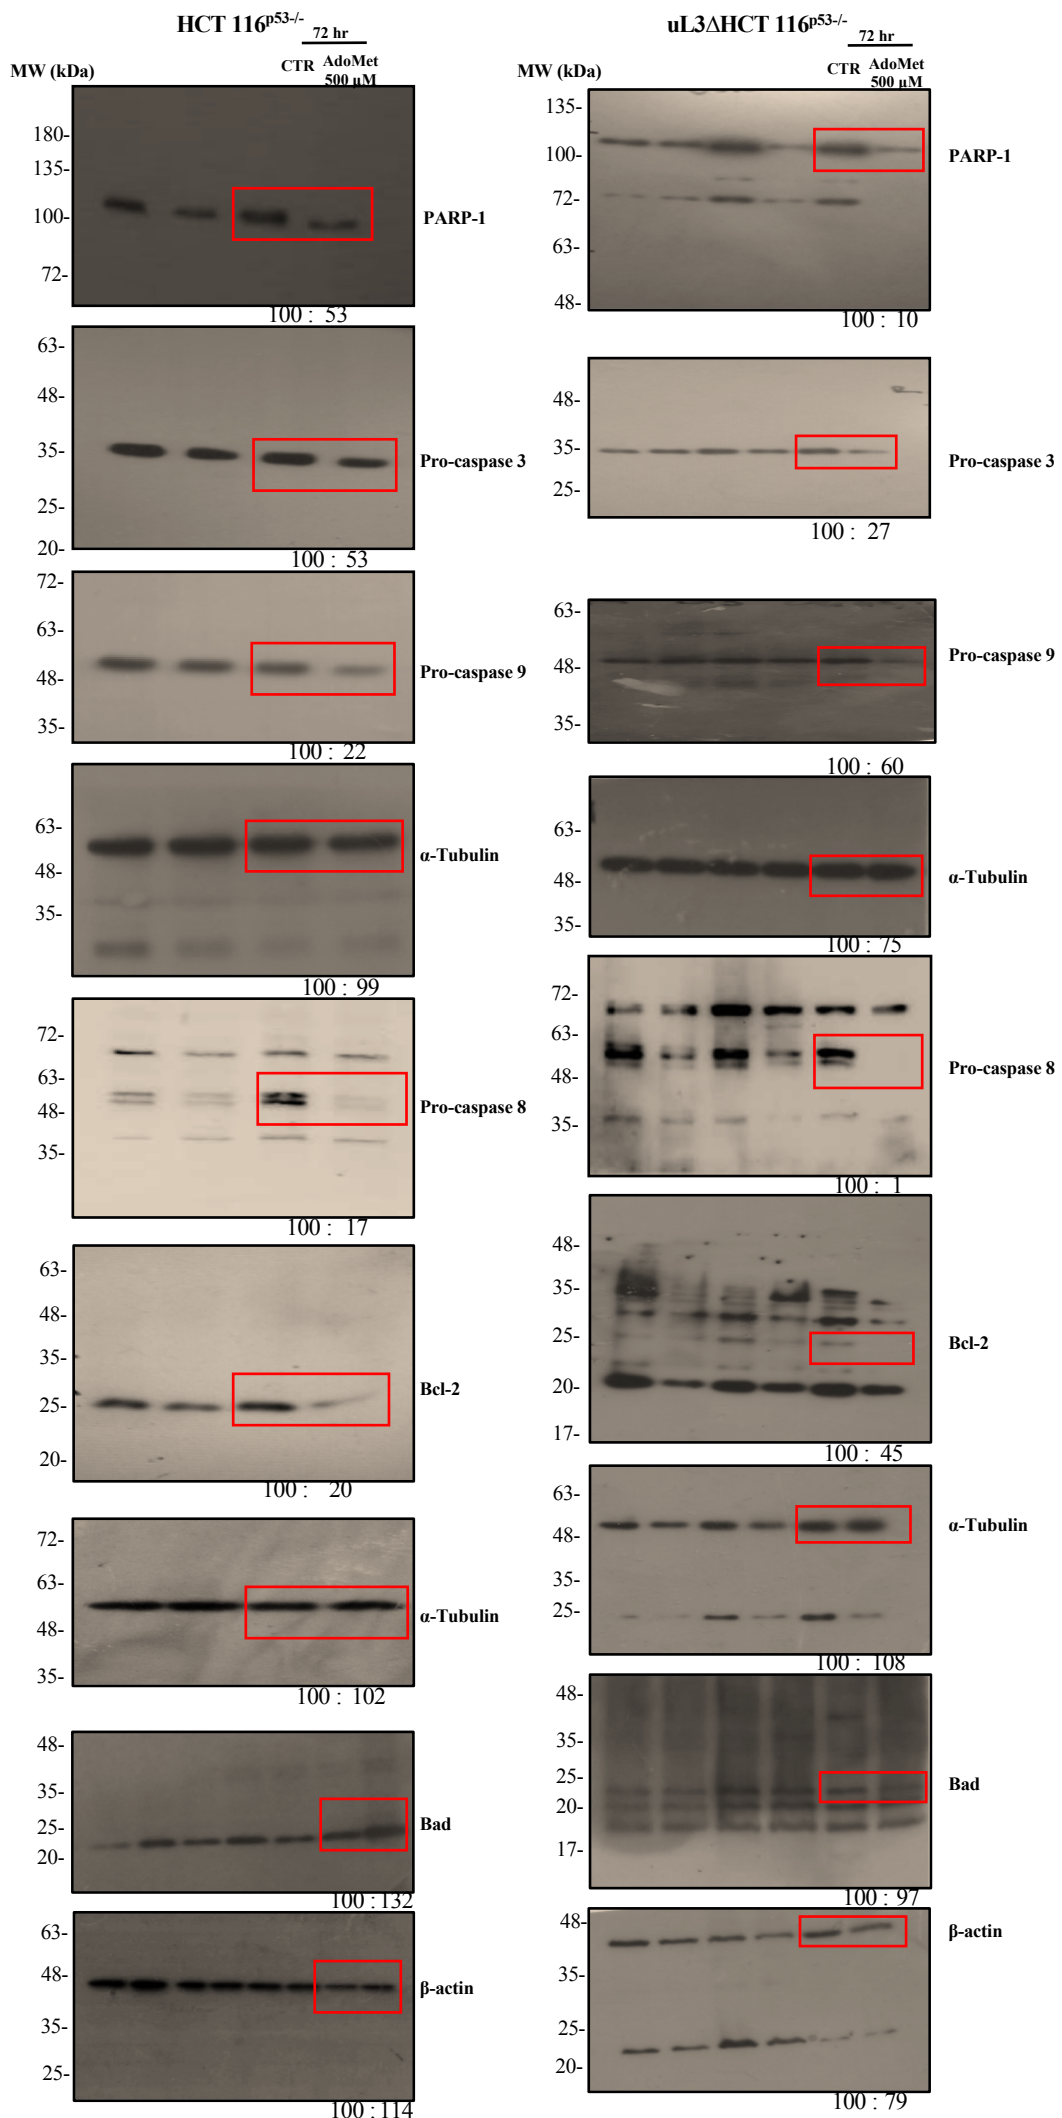

**Figure S2.** Effect of AdoMet on apoptosis in HCT 116<sup>p53-/-</sup> and uL3ΔHCT 116<sup>p53-/-</sup> colon cancer cells. The cropped blots are used in the main figure (Figure 4).

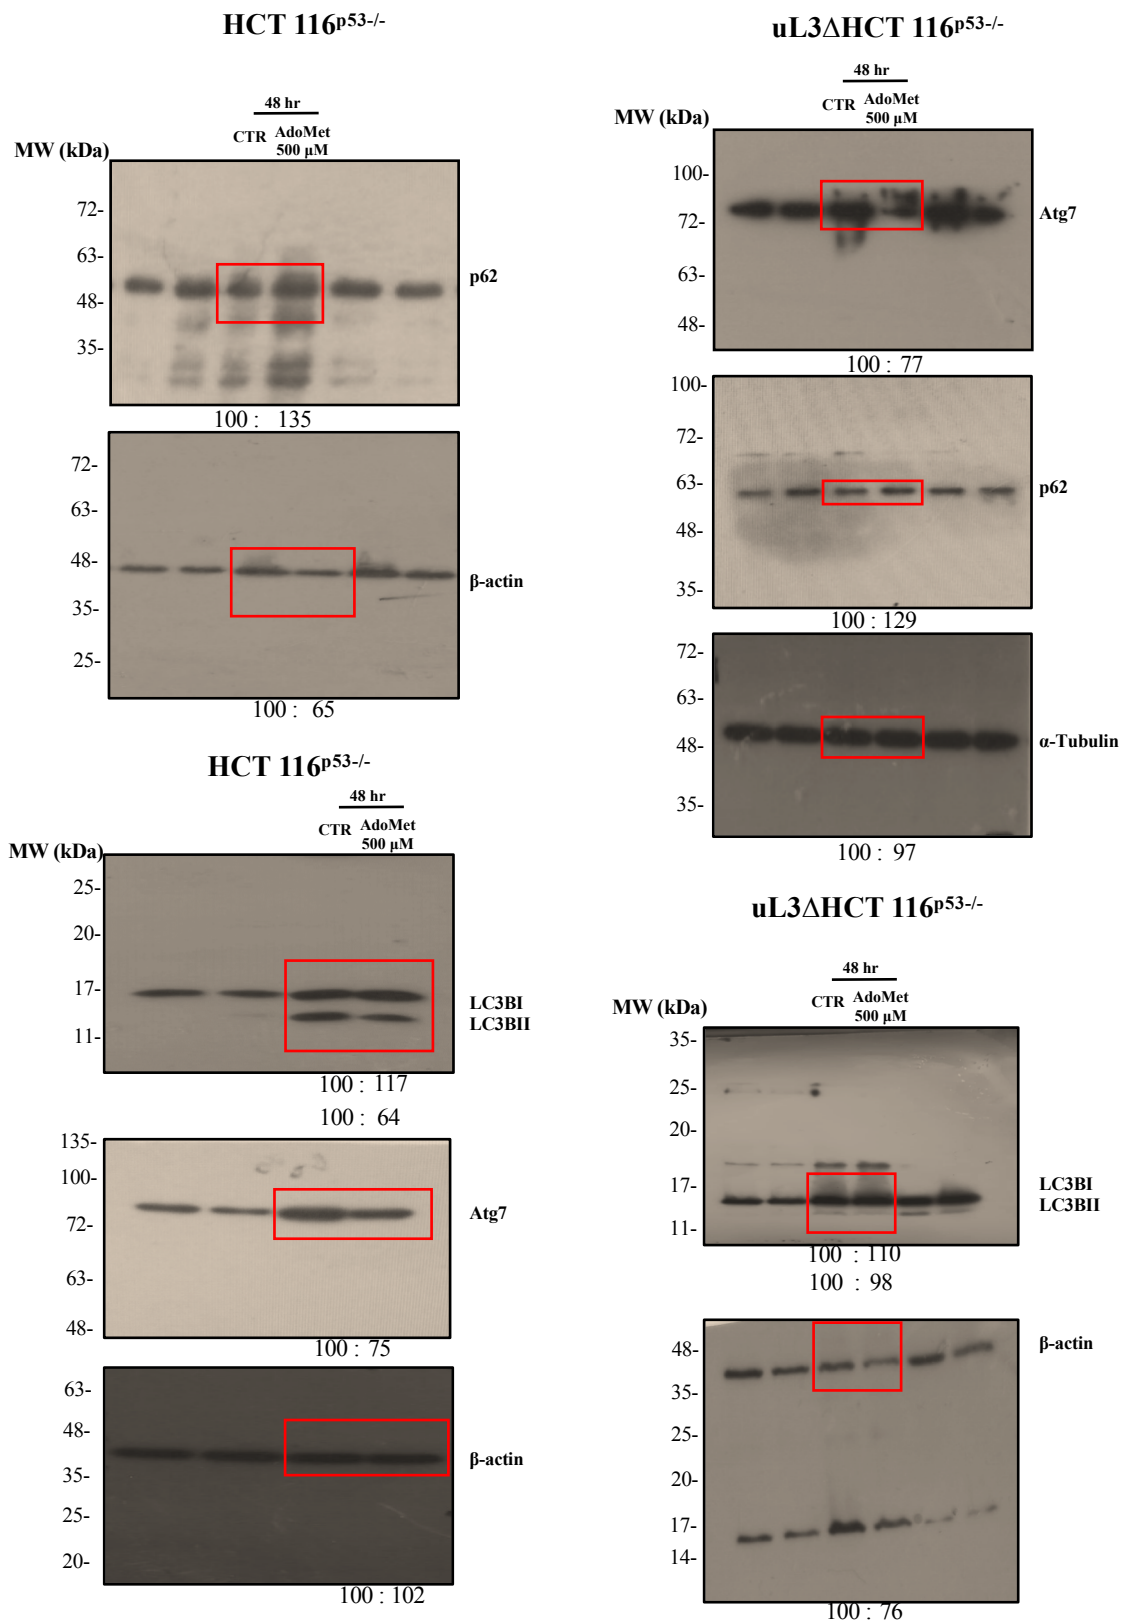

**Figure S3.** Effect of AdoMet on the autophagy related markers in HCT 116<sup>p53-/-</sup> and uL3ΔHCT 116<sup>p53-/-</sup> colon cancer cells. The cropped blots are used in the main figure (Figure 6).
